# Supplementary material for: Mussel-inspired PEGylated carbon nanotubes: biocompatibility evaluation and drug delivery applications
Source: Royal Society of Chemistry journal article supplement (doi:10.1039/c6tx00094k), 2016-01-01
Supplement: c6tx00094k1.pdf [file c6tx00094k1.pdf]

Mussel Inspired PEGylated Carbon Nanotubes: Biocompatibility Evaluation and their Drug Delivery Applications

Hui Xu<sup>a,\*</sup>, Meiying Liu<sup>b</sup>, Ming Lan<sup>b</sup>, Huaying Yuan<sup>a</sup>, Weijen Yu<sup>a</sup>, Jianwen Tian<sup>b</sup>, Qing Wan<sup>b</sup>, Xiaoyong Zhang<sup>b,\*</sup>, Yen Wei<sup>c,\*</sup>

<sup>a</sup> Department of dermatology, Shanghai Ninth People's hospital ,Shanghai JiaoTong University School of Medicine, Shanghai, 200011, China;

<sup>b</sup> Department of Chemistry, Nanchang University, Nanchang 330031, China;

<sup>c</sup> Department of Chemistry and the Tsinghua Center for Frontier Polymer Research, Tsinghua University, Beijing, 100084, China.

## Results

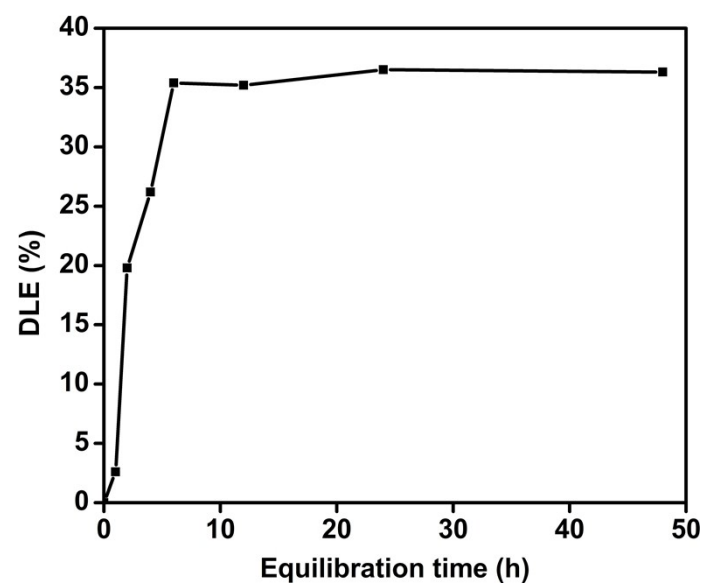

**Fig. S1** Loading of DOX onto PEGylated CNTs. The concentrations of CNTs and DOX are 200 and 100  $\mu\text{g mL}^{-1}$ , respectively.
